# Supplementary material for: Vaccination boosts protective responses and counters SARS-CoV-2-induced pathogenic memory B cells
Source: PubMed Central journal article supplement (PMC8057254; doi:10.1101/2021.04.11.21255153), 2021-05-12

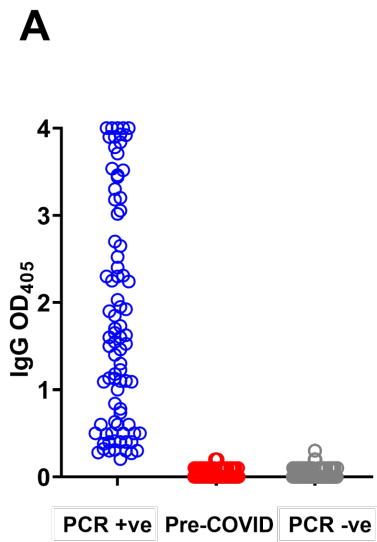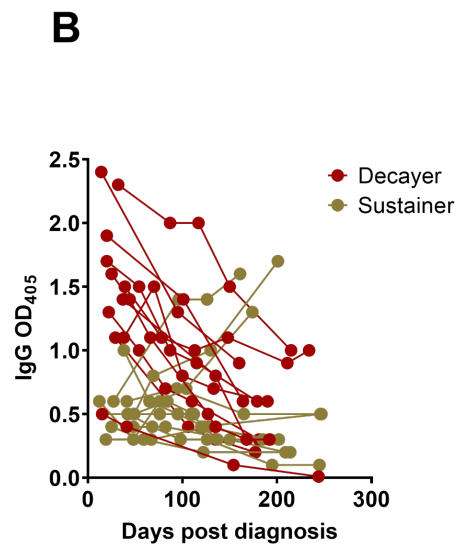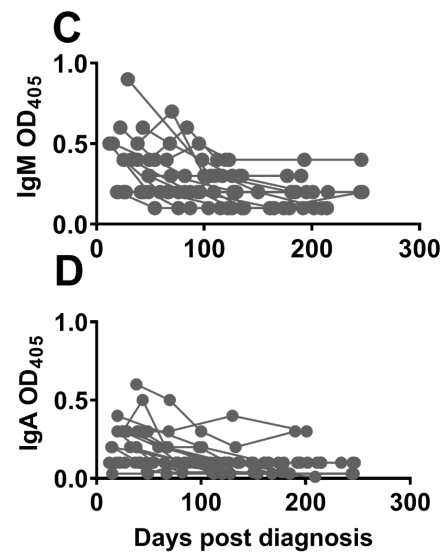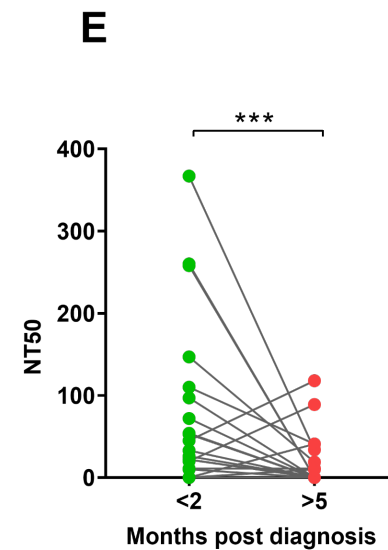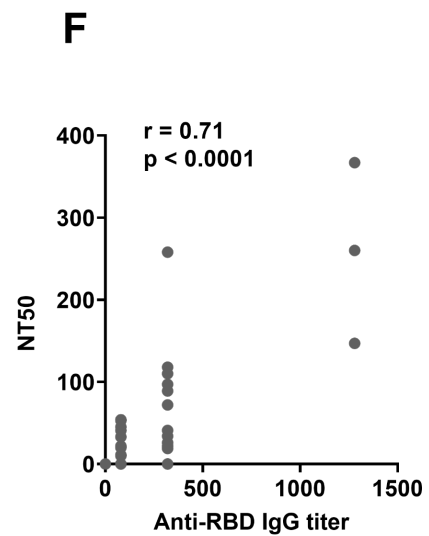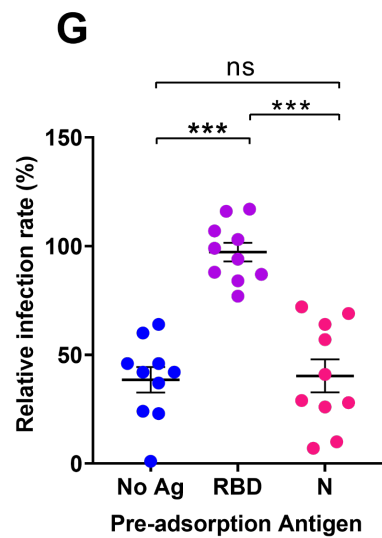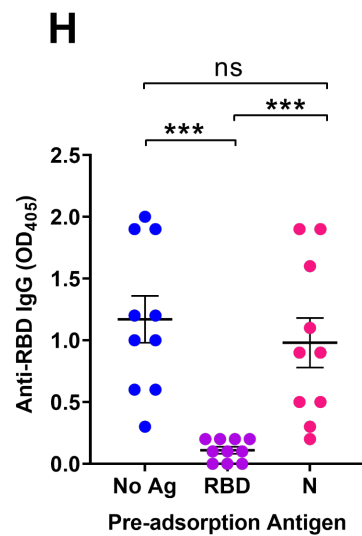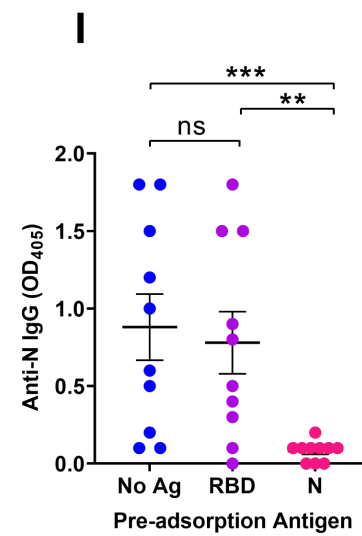

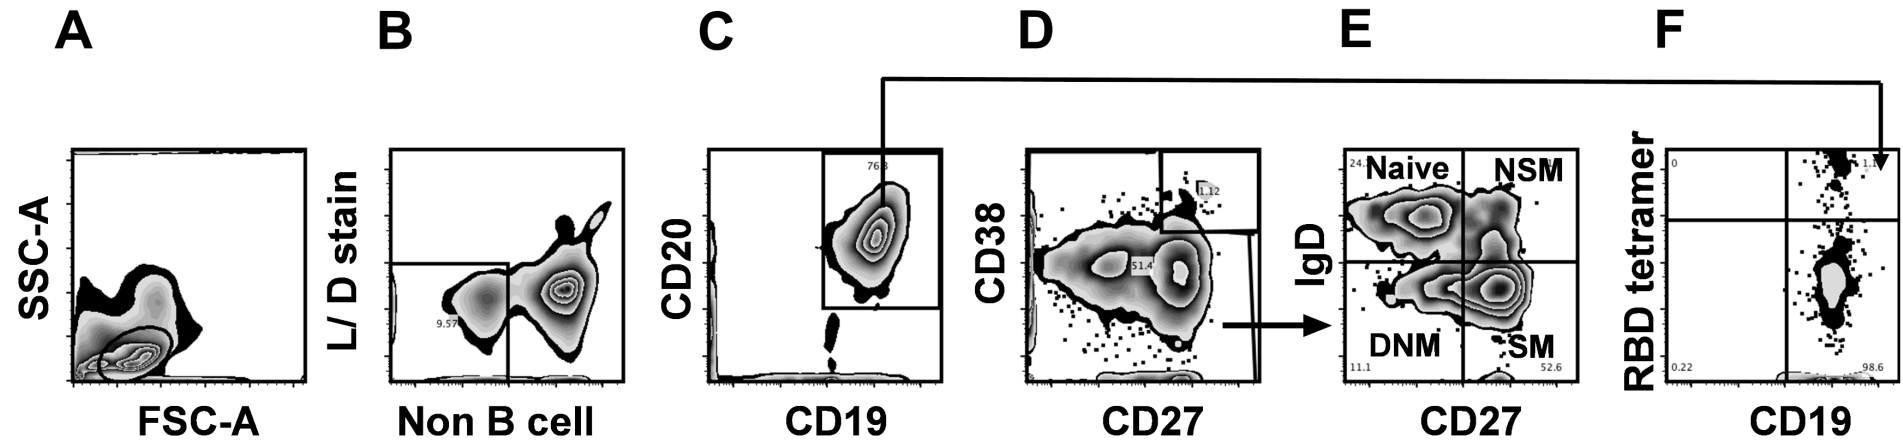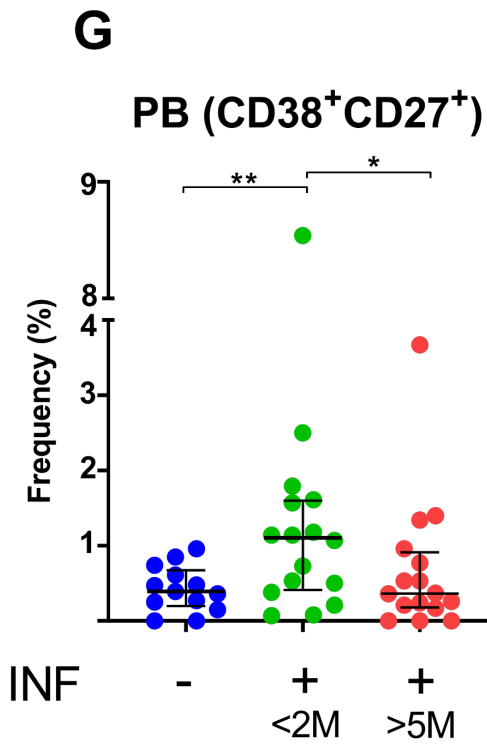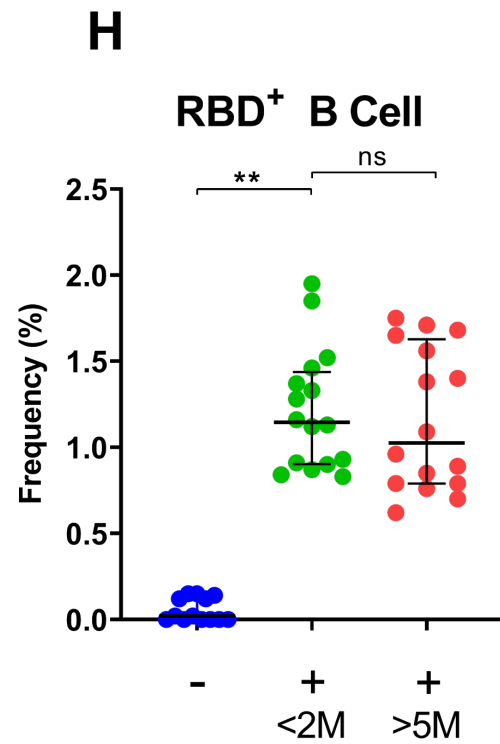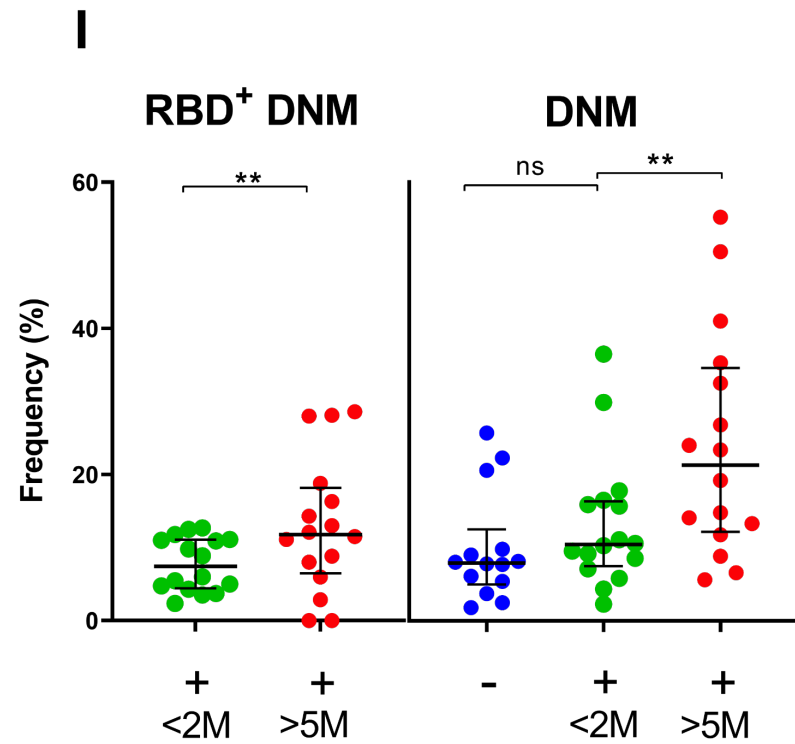

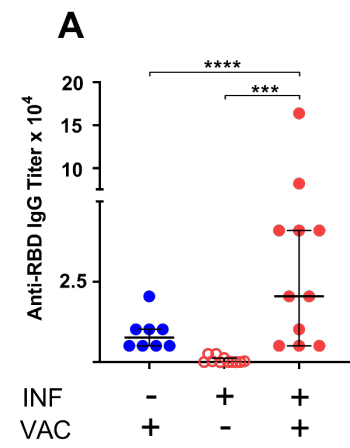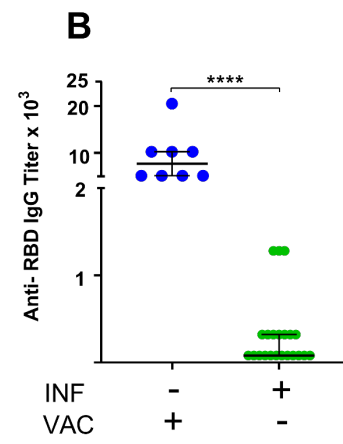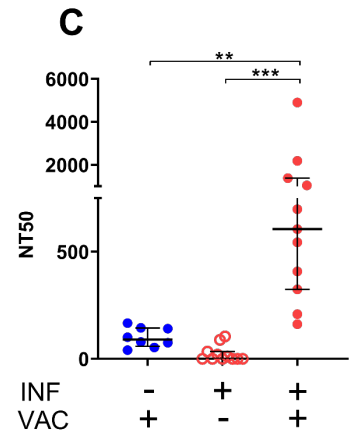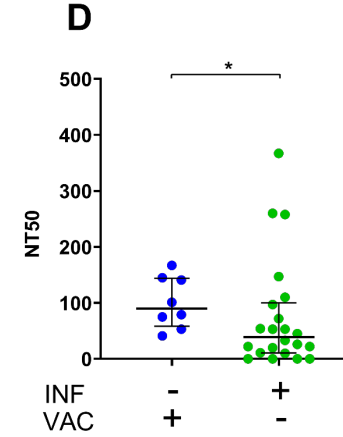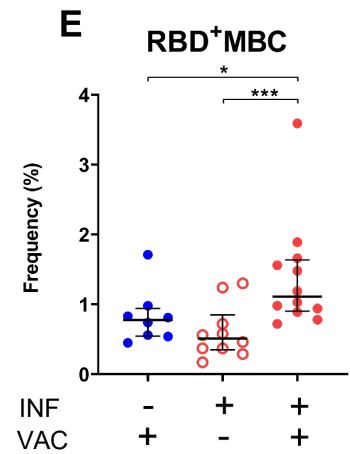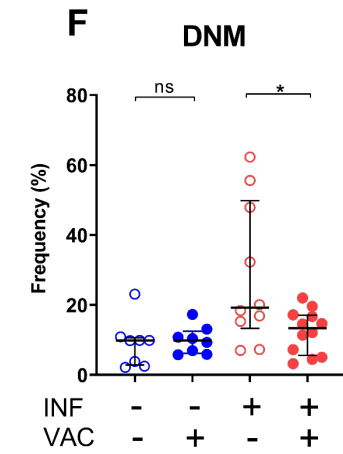

Supplement: media-1.pdf [file media-1.pdf]
