# Supplementary material for: Vaccination boosts protective responses and counters SARS-CoV-2-induced pathogenic memory B cells
Source: bioRxiv or medRxiv preprint supplement (doi:10.1101/2021.04.11.21255153), 2021-05-12
Supplement: Supplementary file [file media-2.pdf]

**A**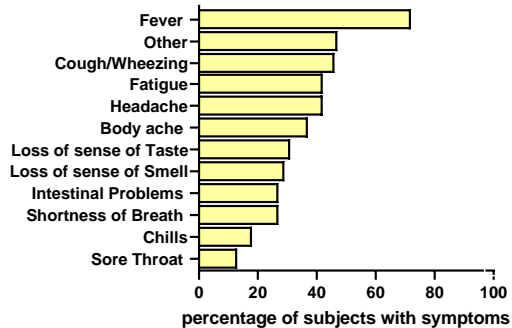**B**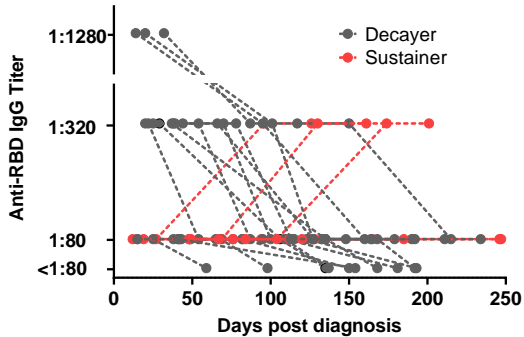**C**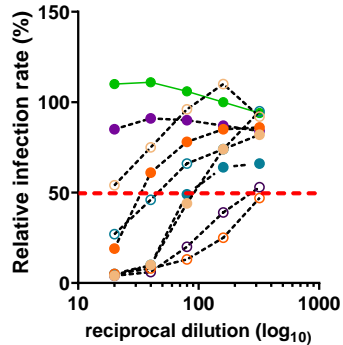

## Supplemental Figure legend

**Supplemental Fig. 1. Supporting Material. (A) Symptoms related to SARS-CoV-2 infection.** Each row represents a (type of) symptoms and expresses the percentage of study subjects who self-reported that symptom(s). The study subjects reported different numbers/types of symptoms, therefore the total number of the symptoms reported exceeds the number of study subjects. **(B) Titers of circulating anti-RBD IgG antibodies.** Trajectories of RBD-specific IgG antibody titers corresponding to the OD405 data shown in main Fig. 1A. Study subjects and definition of sustainers and decayers are as per Fig. 1A. **(C) Method for neutralizing titer 50 (NT50) determination.** Representative neutralization curves are shown to show the determination of 50% neutralization (red dotted line) for the calculation of the NT50 values presented in Main Fig. 1 and Fig. 3. Relative infection rates, shown in the Y axis of the scatter plot, were calculated as in the legend to main Fig. 1. The light green line curve corresponds to an uninfected (negative control) sample exhibiting no neutralizing activity.

**Table 1. Characteristics of study participants**

| <b>Characteristics</b>                                                  | <b>n=83</b>        |
|-------------------------------------------------------------------------|--------------------|
| Age (years), median (IQR*)                                              | 45 (31-56)         |
| Gender, n (%)                                                           |                    |
| Male                                                                    | 38 (46)            |
| Female                                                                  | 45 (54)            |
| Race, n (%)                                                             |                    |
| African American or Black                                               | 6 (7)              |
| Alaskan Native of American Indian                                       | 0 (0)              |
| Asian or Pacific Islander                                               | 13 (16)            |
| White                                                                   | 63 (76)            |
| Other                                                                   | 1 (1)              |
| Ethnicity, n (%)                                                        |                    |
| Hispanic or Latino                                                      | 16 (19)            |
| Non-Hispanic                                                            | 67 (81)            |
| SARS-CoV-2 PCR Positivity, n (%)                                        |                    |
| Positive                                                                | 81 (98)            |
| Negative                                                                | 0 (0)              |
| Not performed**                                                         | 2 (2)              |
| Peak Disease Severity, n (%) [Female (F), Male (M)]                     |                    |
| Asymptomatic                                                            | 1 (1) [0F, 1M]     |
| Mild (Non-hospitalized; 1-4 symptoms)                                   | 55 (66) [30F, 25M] |
| Moderate (Non-hospitalized; 5 or more symptoms)                         | 22 (27) [16F, 6M]  |
| Severe (Hospitalized)                                                   | 5 (6) [2F, 3M]     |
| Days After Symptom Onset at Initial Collection (n=82***), median (IQR*) | 34 (26-42)         |

\*Interquartile range.

\*\*Subjects who did not receive the PCR test were diagnosed by exposure history (PCR-positive household members), COVID-19 symptoms, and positive chest x-ray findings.

\*\*\*The asymptomatic subject was not included.

**Table 2. Characteristics of study subjects followed longitudinally**

| <b>Characteristics</b>                                                  | <b>n=23</b>      |
|-------------------------------------------------------------------------|------------------|
| Age (years), median (IQR*)                                              | 39 (31-56)       |
| Gender, n (%)                                                           |                  |
| Male                                                                    | 9 (39)           |
| Female                                                                  | 14 (61)          |
| Race, n (%)                                                             |                  |
| African American or Black                                               | 2 (9)            |
| Alaskan Native of American Indian                                       | 0 (0)            |
| Asian or Pacific Islander                                               | 3 (13)           |
| White                                                                   | 18 (78)          |
| Ethnicity, n (%)                                                        |                  |
| Hispanic or Latino                                                      | 6 (26)           |
| Non-Hispanic                                                            | 17 (74)          |
| SARS-CoV-2 PCR Positivity, n (%)                                        |                  |
| Positive                                                                | 21 (91)          |
| Negative                                                                | 0 (0)            |
| Not performed**                                                         | 2 (9)            |
| Peak Disease Severity, n (%) [Female (F), Male (M)]                     |                  |
| Asymptomatic                                                            | 1 (4) [0F, 1M]   |
| Mild (Non-hospitalized; 1-4 symptoms)                                   | 15 (65) [6F, 9M] |
| Moderate (Non-hospitalized; 5 or more symptoms)                         | 7 (31) [5F, 2M]  |
| Severe (Hospitalized)                                                   | 0 (0) [0F, 0M]   |
| Days After Symptom Onset at Initial Collection (n=22***), median (IQR*) | 38.5 (26-42)     |

\*Interquartile range.

\*\*Subjects who did not receive the PCR test were diagnosed by exposure history (PCR-positive household members), COVID-19 symptoms, and positive chest x-ray findings.

\*\*\*The asymptomatic subject was not included.

**Table S3. Comparison of cell subsets in non-infected and infected subjects**

| Cell subset             | Phenotype                                            | A, Non-infected  | B, Infected <2m post | C, Infected >5m post | p value              |                       |
|-------------------------|------------------------------------------------------|------------------|----------------------|----------------------|----------------------|-----------------------|
|                         |                                                      |                  |                      |                      | A vs. B <sup>i</sup> | B vs. C <sup>ii</sup> |
| Total B Cell            | CD19 <sup>+</sup> CD20 <sup>+</sup>                  | 9.6 (7.0-12.0)   | 6.0 (4.0-10.7)       | 6.4 (4.8-8.1)        | 0.08                 | 0.36                  |
| PB                      | CD38 <sup>hi</sup> CD27 <sup>+</sup>                 | 0.4 (0.2 - 0.7)  | 1.1 (0.4-1.6)        | 0.37 (0.2-0.9)       | 0.01                 | 0.04                  |
| Non-PB                  | CD38 <sup>lo</sup>                                   | 64.5 (47.1-65.9) | 51.2 (41.7-59.6)     | 56.6 (49.5-65.8)     | 0.03                 | 0.005                 |
| Naïve                   | CD27 <sup>-</sup> IgD <sup>+</sup>                   | 55(42.2-59.7)    | 34.9(25.9-34.8)      | 30.2(18.1-35.8)      | 0.0004               | 0.04                  |
| NSM                     | CD27 <sup>+</sup> IgD <sup>+</sup>                   | 11 (6.9-16.2)    | 12.1 (7.0-18.3)      | 9.7 (2.8-14.6)       | 0.27                 | 0.04                  |
| SM                      | CD27 <sup>+</sup> IgD <sup>-</sup>                   | 23.4 (21.3-29.3) | 36.2 (26.6-51.6)     | 35 (28.2-43.5)       | 0.006                | 0.25                  |
| SM IgM <sup>+</sup>     | CD27 <sup>+</sup> IgD <sup>-</sup> IgM <sup>+</sup>  | 14.9 (9.2-22.3)  | 4.3(3.5-5.9)         | 10.1(7.7-17.3)       | 0.001                | <0.0001               |
| SM IgG <sup>+</sup>     | CD27 <sup>+</sup> IgD <sup>-</sup> IgG <sup>+</sup>  | 6.7 (2.0-8.0)    | 4.3(3.5-5.9)         | 7.7(2.7-14.9)        | 0.21                 | 0.04                  |
| DNM                     | CD27 <sup>-</sup> IgD <sup>-</sup>                   | 7.9(5.0-12.5)    | 10.4 (7.5-16.4)      | 21.3 (12.2-34.6)     | 0.08                 | 0.003                 |
| RBD <sup>+</sup> B Cell | CD19 <sup>+</sup> CD20 <sup>+</sup> RBD <sup>+</sup> | ND               | 1.13 (0.88-1.36)     | 1.03 (0.8-1.62)      | NA                   | 0.08                  |
| RBD <sup>+</sup> Naïve  | RBD <sup>+</sup> CD27 <sup>-</sup> IgD <sup>+</sup>  | ND               | 50.9(40.6-68.7)      | 50 (43.3-62.0)       | NA                   | 0.30                  |
| RBD <sup>+</sup> NSM    | RBD <sup>+</sup> CD27 <sup>+</sup> IgD <sup>+</sup>  | ND               | 5.4 (3.3-14.3)       | 8.6 (5.3-14.2)       | NA                   | 0.4                   |
| RBD <sup>+</sup> SM     | RBD <sup>+</sup> CD27 <sup>+</sup> IgD <sup>-</sup>  | ND               | 27.1(14.1-39.3)      | 21.4(13.2-35.6)      | NA                   | 0.42                  |
| RBD <sup>+</sup> DNM    | RBD <sup>+</sup> CD27 <sup>-</sup> IgD <sup>-</sup>  | ND               | 7.4 (4.4-11.1)       | 11.8(6.5)-18.2       | NA                   | 0.01                  |

Data are presented as median and interquartile range (IQR); PB - Plasmablast; NSM - non switched memory; SM - switched memory;

DNM - double-negative memory

<sup>i</sup>Comparison between non-infected and infected (<2 months) using Mann-Whitney U test

<sup>ii</sup>Comparison between infected (<2 months) and infected (>5 months) using Wilcoxon matched pairs test

ND, Non detected

NA, Not applicable

**Table S4. Comparison of cell subsets in pre- and post-vaccinations of non-infected and infected subjects**

| Cell subset             | Phenotype                                            | A, Infected, pre-vac | B, Infected, post-vac | C, Non-infected, pre-vac | D, Non-infected, post-vac | p value              |                       |
|-------------------------|------------------------------------------------------|----------------------|-----------------------|--------------------------|---------------------------|----------------------|-----------------------|
|                         |                                                      |                      |                       |                          |                           | A vs. B <sup>i</sup> | C vs. D <sup>ii</sup> |
| B Cell                  | CD19 <sup>+</sup> CD20 <sup>+</sup>                  | 5.1 (3.3-7.2)        | 3.5 (2.2 -4.7)        | 12.25 (11.5-16.7)        | 4.3 (3.2-4.8)             | 0.03                 | 0.004                 |
| RBD <sup>+</sup> B Cell | CD19 <sup>+</sup> CD20 <sup>+</sup> RBD <sup>+</sup> | 0.5 (0.3-0.8)        | 1.1 (0.9-1.6)         | ND                       | 0.8 (0.5-0.9)             | 0.003                | 0.004                 |
| PB                      | CD38 <sup>hi</sup> CD27 <sup>+</sup>                 | 0.6 (0.1-1.1)        | 0.4 (0-1.2)           | 0.4 (0.06-0.9)           | 0.2 (0.2-0.6)             | 0.31                 | 0.34                  |
| Non-PB                  | CD38 <sup>lo</sup>                                   | 59.8(48.4 -66)       | 58(52.8-62.8)         | 66.3 (63.3-69.4)         | 62.1 (58.4-65)            | 0.42                 | 0.02                  |
| Naïve                   | CD27 <sup>-</sup> IgD <sup>+</sup>                   | 25.8 (12.5-37.1)     | 63.3 (5.4-71.7)       | 57.7 (49.1-63.6)         | 66.5 (64.1-73.9)          | 0.002                | 0.01                  |
| NSM                     | CD27 <sup>+</sup> IgD <sup>+</sup>                   | 5.7(0.4-10.6)        | 3.5(2.7-9.3)          | 9.7(9.0-11.4)            | 5.4(3.7-8.9)              | 0.42                 | 0.01                  |
| SM                      | CD27 <sup>+</sup> IgD <sup>-</sup>                   | 41.7 (25.1-49.7)     | 14.9 (12.5-17.7)      | 23.4 (20.2-30.6)         | 14.9 (12.5-17.7)          | 0.002                | 0.01                  |
| DNM                     | CD27 <sup>-</sup> IgD <sup>-</sup>                   | 19.2 (13.3-49.8)     | 14.7 (9.8-17.8)       | 9.9(2.9-10.6)            | 9.8(6.1-12.5)             | 0.007                | 0.27                  |

Data are presented as median and interquartile range (IQR); PB - Plasmablast; NSM - non switched memory; SM - switched memory;

DNM - double negative memory; vac - vaccination

Comparisons of infected pre- vs post-vaccination<sup>i</sup> and non-infected pre- vs post-vaccination<sup>ii</sup> using Wilcoxon matched pairs test
